# Supplementary material for: Role clarity deficiencies can wreck agile teams
Source: PeerJ Comput Sci. 2019 Dec 16;5:e241. doi: 10.7717/peerj-cs.241 (PMC7924487; doi:10.7717/peerj-cs.241)
Supplement: Supplemental Information 1 [file peerj-cs-05-241-s001.xlsx]

## Sheet: Sheet1
To preserve anonymity (see consent form ''torn out of context''), only the parts which are published in the article are given in this document in full length and original languages.
Speaker	Segment	Interview line Number Start
t5sm1	Bei ihm ist auch Selbstbild und Fremdbild ein bisschen anders. Also wenn ich ihm jetzt Feedback gegeben habe.. "das ist nicht gut das nicht gut das" , sagt er: " hä, achso das kann ich gar nicht einsehen ich dachte ich bin ich hier der super high performer und er ist der beste von allen. Das hat auch t5teamlead in seinen Gesprächen so festgestellt mit ihm. Das ist halt das Problem und ich habe ih…	44
t5sm1	Er hat schon einen anderen Stand und der sagt das auch selber von sich so im englischen: " it's hard to learn about new tricks" Das weiß er auch selber. Er weiß, dass er Probleme hat und wir versuchen ihn so ein bisschen in Richtung QA zu bringen und ihn da zu fokussieren auf einem Bereich was er betreiben kann	45
t4sm2	Und (..)dann haben wir/ habe ich das mal in der Retro angesprochen. Und da habe ich auch einen sehr offenen Umgang (.) erlebt damit. Also t4dev3 hat damals sehr offen gesagt, dass er das absichtlich macht und was er damit bezwecken will und was seine Taktik ist. Und dann habe ich so plötzlich gemacht wie geht es euch denn damit, wie fühlt ihr euch ? Habe ich tatsächlich auch selber mitgemacht, ha…	121
t4sm2	Das war auch ein crossfunktionelles Team. Die haben sich mit ehm (..) kann jetzt nicht so ganz viel drüber erzählen, aber ich muss um Sicherheitsthemen meinem Portal/ (.) also insofern halt nicht so crossfunktional wie mit Customer Support drin sondern das war halt dann natürlich schon irgendwie so Security lastig, viele Entwickler (...)(...)und zum einen war es ein Team was relativ lange/ also e…	155
t2test1	Whenever he wants something from me, he is allways asking somebody else. awkward. He was complaining to his boss, that i should ask him somehow question as a sm. I feel like a babysitter. I do not have direct communication to him.maaybe i did somehting in the past. I have no idea. I did not ask him. I try to make him more active. We just understund our roles, than he came in the team. We do not k…	12
t2dev1	Aber das ist natürlich ein langer Prozess. Das ist einfach eine Umstellung im denken, also eine mentale Umstellung. Es ist wahnsinnig schwierig, da musst du schon sehr viel Selbstreflexion haben. Sehr viel darüber nachdenken was passiert. Also was passiert gerade in meiner Umgebung und wie wirkt sich das auf dich aus. Das ist eine reine reflexive Sache. Und jetzt sag ich mal ein böses Wort, was m…	13
t2dev1	Er ist zwar manchmal bisschen langsam, aber hey! Er macht seinen Job und er macht ihn/. I: Langsam in was? B: In der Implementierung. Es dauert ein bisschen länger bei ihm. Aber darum geht es ja nicht. Hauptsache es funktioniert am Ende. Mir ist ja egal, wie lange es dauert. Hauptsache es funktioniert. Es muss funktionieren. Das war es eigentlich.	85
t2dev1	Nicht so explizit ausgedrückt, aber durchaus angedeutet "nääh". Und das ist dann einfach/ das hemmt mich dann manchmal/ also mich pesönlich hemmt das dann manchmal. Ich weiß nicht wie es den anderen geht aber ich hab schon oft den Eindruck, dass Dinge anders besprochen werden weil er einfach/er kann nichts beitragen an der Stelle, wenn es dann an Details geht, wie man das intern macht. Wie man De…	93
t2dev1	Ne, das kriegt man dann so im Planungs Meeting. Ja wir haben hier eine User-Story für Test-(unv.). Ja ich wollte das und das machen . Ok. Jo mach mal. Was hat das jetzt mit uns zu tun? Nichts. Gut. Warum bist du hier? Keine Ahnung. Warum stehst du in unserem Sprint- (unv.)? Weiß ich nicht.	99
t2dev1	Und ich habe im Laufe der Jahre eine enorme Geduld entwickelt. Aber irgendwann ist auch da mal Ende. Das habe ich ihm auch sehr deutlich zu spüren gegeben. Also jetzt nicht auf beliigende Art, abr ich habe ihm schon sehr deutlich gesagt, was ich davon halte, dass er ...(3 sek) er aus meiner Sicht ziemlich viel Scheiße baut und ziemlich viel Unsinn macht und Leute nicht beteiligt. Also wirklich un…	141
t2dev1	Er trifft keine einsamen Cowboy Entscheidungen mehr. Er versucht auch mal bei Gesprächen mit/ über Themen von denen er keine Ahnung hat und die ihn eigentlich auch nicht interessieren auch mal zuzuhören und auch mal was zu sagen. Er bingt seine Ideen ein bevor er sie umsetzt. Wie soll ich das sagen/ Ok ich bin jetzt nochmal arrogant: Ihr hört auf mich. Ja es ist/ es hört sich wirklich dumm an abe…	143
t2dev1	Na wir hatten irgendwann mal ein Konfliktgespräch zusammen mit t2po und da habe ich gesagr: "t2dev2 ich respektiere nicht was du tust, weil es oftmals undurchdacht ist. Es ist ungenau, es ist unsauber, es ist schlecht umgesetzt, es ist nicht abgesprochen, es verursacht unglaublich viel Arbeit. Auch in der Zukunft. Und gerade in der Zukunft deswegen kann ich dich als Entwickler nicht respektieren.…	145
